# Supplementary material
Source: Springer Nature journal article supplement (https://www.springermedizin.de/resource/supplementary/12958_2011_923_MOESM4_ESM.pdf/9568838)

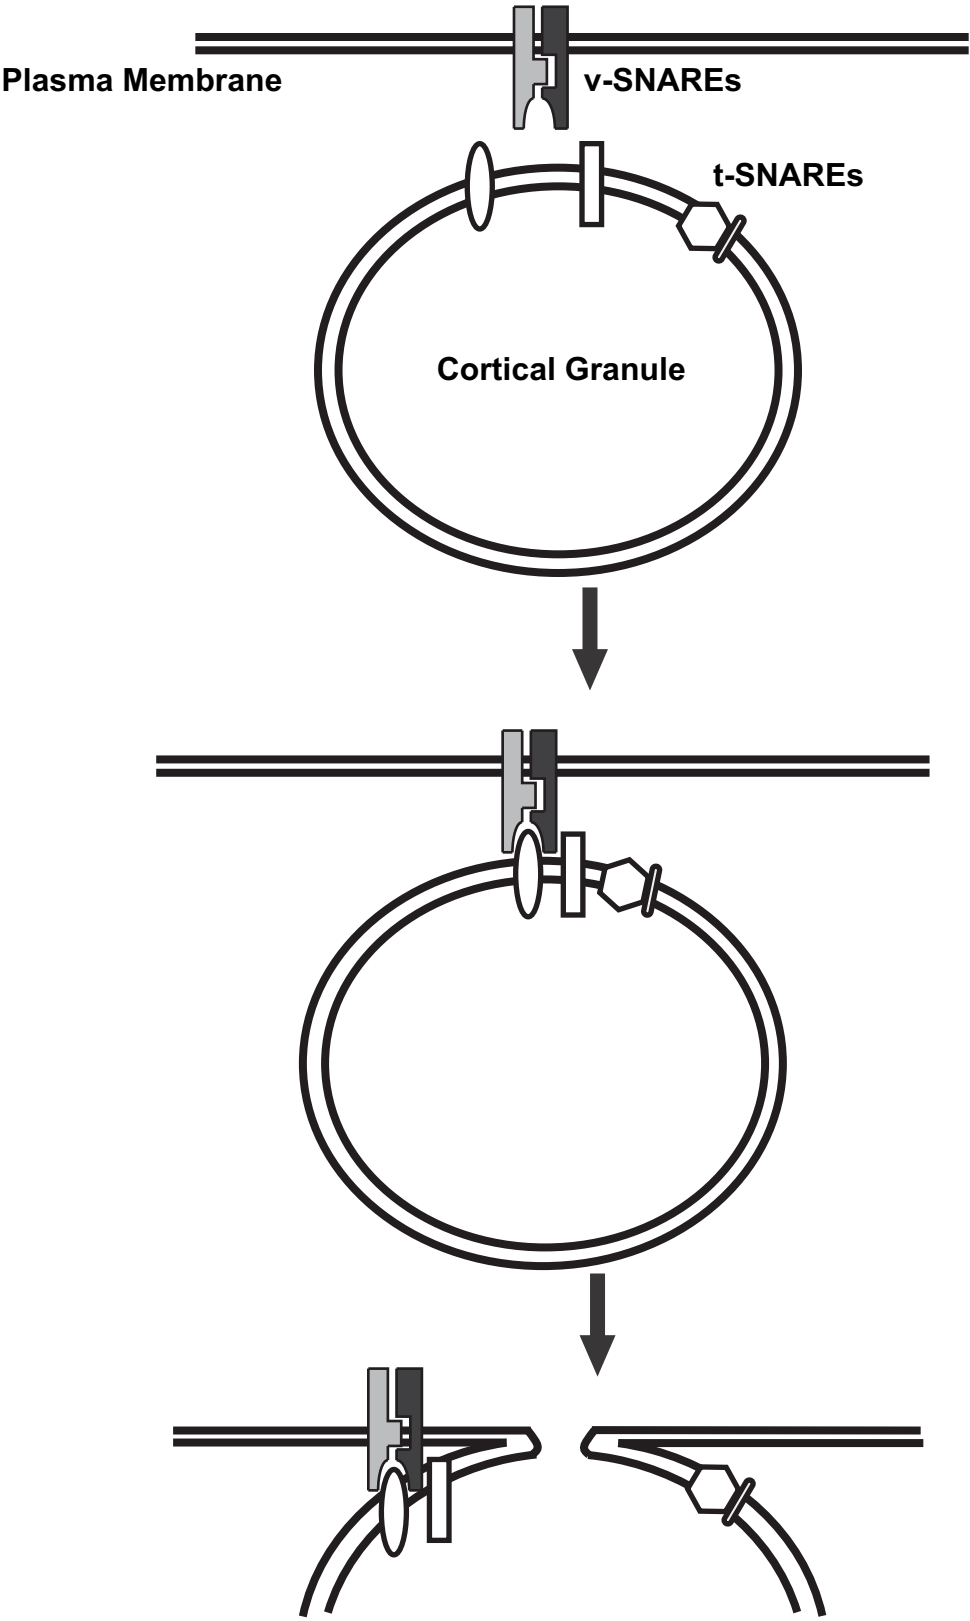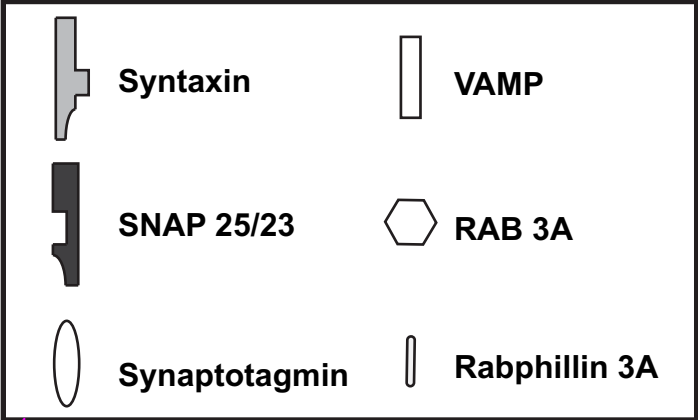

Figure 4

Supplement: MOESM4 [file 9568838]
